# Supplementary material for: Uncovering low-level mosaicism in human embryonic stem cells using high throughput single cell shallow sequencing
Source: PubMed Central journal article supplement (PMC6796059; doi:10.1038/s41598-019-51314-6), 2019-10-16
Supplement: 41598_2019_51314_MOESM1_ESM.pdf [file 41598_2019_51314_MOESM1_ESM.pdf]

**Uncovering low-level mosaicism in human embryonic stem cells using high throughput single cell shallow sequencing**

Alexander Keller<sup>1</sup>, Laurentijn Tilleman<sup>2</sup>, Dominika Dziedzicka<sup>1</sup>, Filippo Zambelli<sup>3</sup>, Karen Sermon<sup>1</sup>, Filip Van Nieuwerburgh<sup>2</sup>, Claudia Spits<sup>1</sup>, Mieke Geens<sup>1\*</sup>

1 – Research Group Reproduction and Genetics, Vrije Universiteit Brussel, Laarbeeklaan 103, 1090, Brussels, Belgium 2 – Laboratory of Pharmaceutical Biotechnology, Ghent University, Ottergemsesteenweg 460, 9000, Ghent, Belgium 3 – Clínica EUGIN, Travessera de les Corts 322, Barcelona 08029, Spain

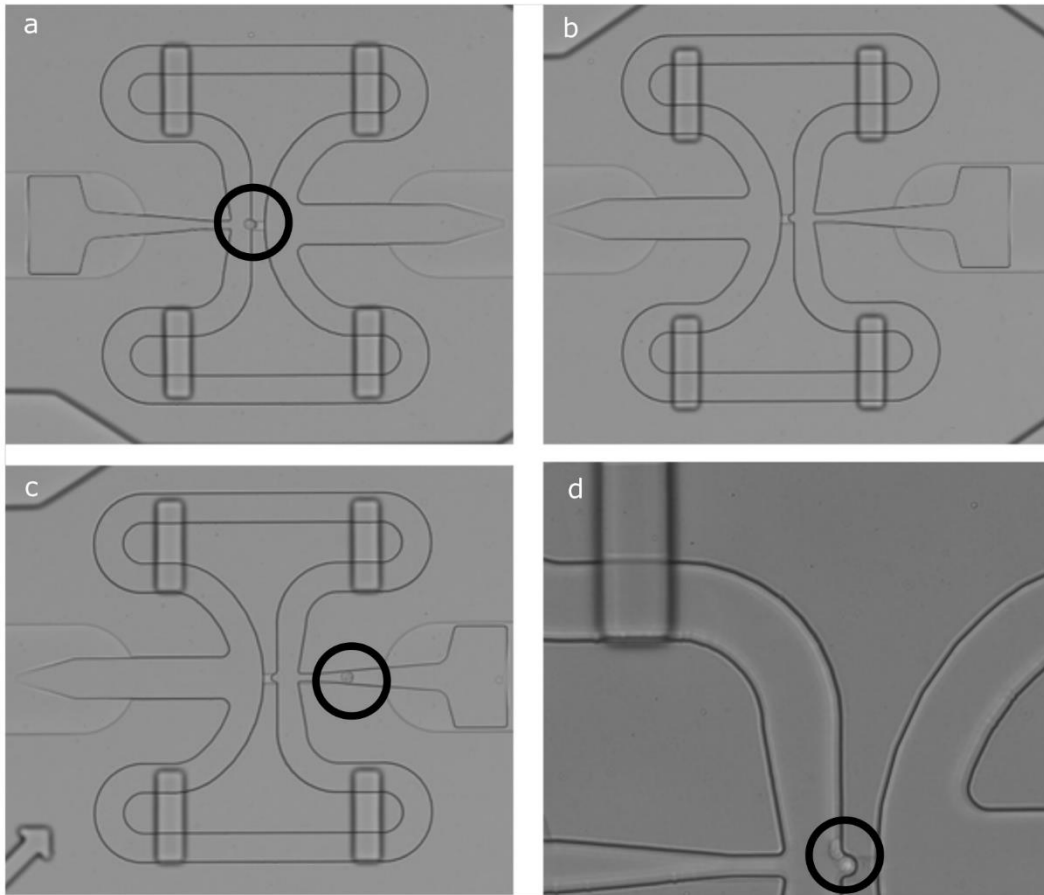

**Supplementary Figure 1. Cell capture sites:** Images of the C1 chip capture sites. (a) Single cell at the normal capture site. (b) Absence of a cell (c) Single cell in reaction chamber, not on capture site. (d) Two cells at the capture site.
